# Supplementary material for: Novel Ti4+-chelated magnetic nanostructured affinity microspheres containing N-methylene phosphonic chitosan for highly selective enrichment and rapid separation of phosphopeptides
Source: Royal Society of Chemistry journal article supplement (doi:10.1039/c4tb00916a), 2014-08-18
Supplement: c4tb00916a1.pdf [file c4tb00916a1.pdf]

# Novel $\text{Ti}^{4+}$ -chelated magnetic nanostructured affinity microspheres containing N-methylene phosphonic chitosan for highly selective enrichment and rapid separation of phosphopeptides

Zhi-Gang Wang,<sup>ab</sup> Ji-Lin Zhang,<sup>a\*</sup> De-Hui Sun<sup>c</sup> and Jia-Zuan Ni<sup>ad</sup>

<sup>a</sup> State Key Laboratory of Rare Earth Resource Utilization, Changchun Institute of Applied Chemistry, Changchun 130022, China

<sup>b</sup> University of Chinese Academy of Sciences, Beijing 100049, China

<sup>c</sup> Changchun Institute Technology, Changchun 130012, China

<sup>d</sup> College of Life Science, Shenzhen University, Shenzhen 518060, China

## Supporting Information

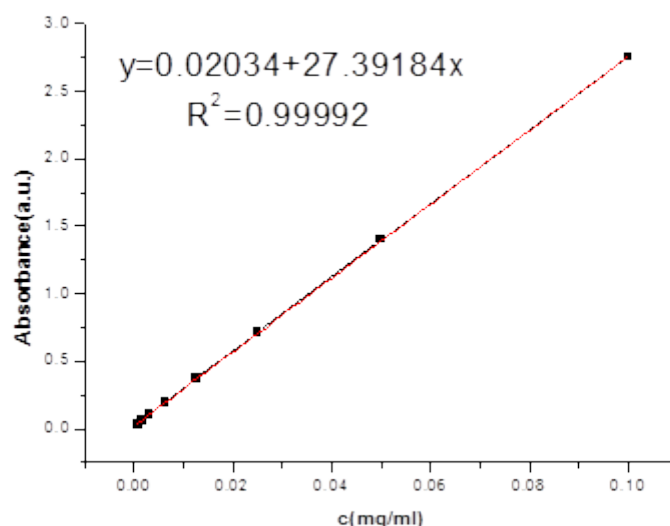

Fig. S1. The standard curve and the fitted standard equation of p-Nitrophenyl disodium orthophosphate (PNPP) using 311 nm as detecting wavelength.

Table S1. List of phosphopeptides enriched by MPCs-Ti<sup>4+</sup> microspheres from the tryptic digest of  $\beta$ -casein.

| <b>No.</b>                 | <b>MH<sup>+</sup></b> | <b>Peptide sequence</b>               | <b>Phosphorylation site</b> |
|----------------------------|-----------------------|---------------------------------------|-----------------------------|
| <b><math>\beta</math>1</b> | 2061.8                | FQ[pS]EEQQQTEDELQDK                   | 1                           |
| <b><math>\beta</math>2</b> | 2556.0                | FQ[pS]EEQQQTEDELQDKIHPF               | 1                           |
| <b><math>\beta</math>3</b> | 3122.2                | RELEELNVPGEIVE[pS]L[pS][pS][pS]EESITR | 4                           |

[pS], phosphorylated site

Table S2. List of endogenous phosphopeptides enriched by MPCs-Ti<sup>4+</sup> microspheres from human serum.

| <b>No</b>  | <b>MH<sup>+</sup></b> | <b>Peptide sequence</b> | <b>Number of phosphorylation</b> |
|------------|-----------------------|-------------------------|----------------------------------|
| <b>HS1</b> | 1389.6                | D[pS]GEGDFLAEGGGV       | 1                                |
| <b>HS2</b> | 1460.3                | AD[pS]GEGDFLAEGGGV      | 1                                |
| <b>HS3</b> | 1545.7                | D[pS]GEGDFLAEGGGVR      | 1                                |
| <b>HS4</b> | 1616.8                | AD[pS]GEGDFLAEGGGVR     | 1                                |

[pS], phosphorylated site
